# Supplementary material
Source: Springer Nature journal article supplement (https://www.springermedizin.de/resource/supplementary/12950_2010_185_MOESM1_ESM.pdf/9558234)

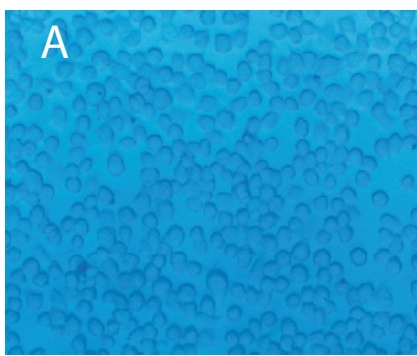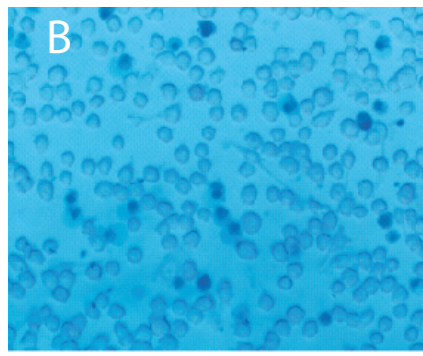

(10X)

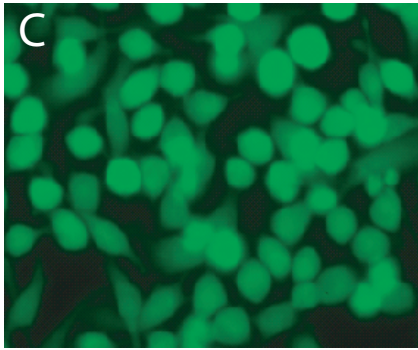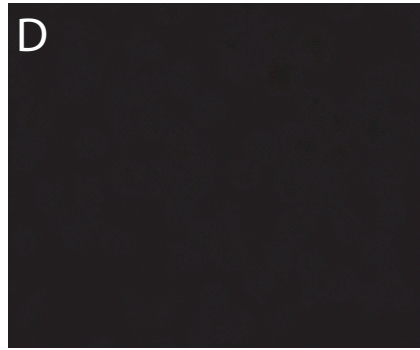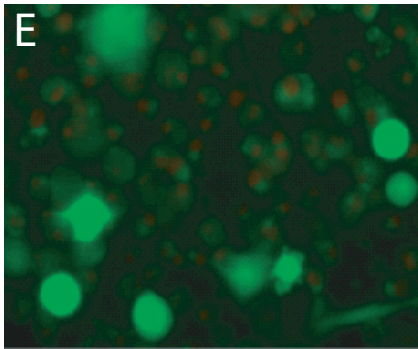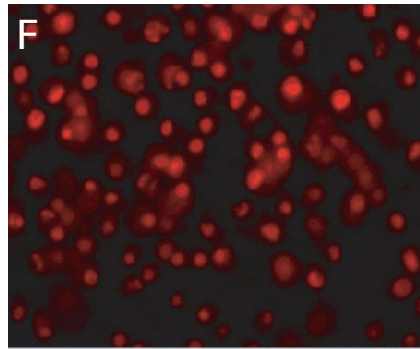

(20X)

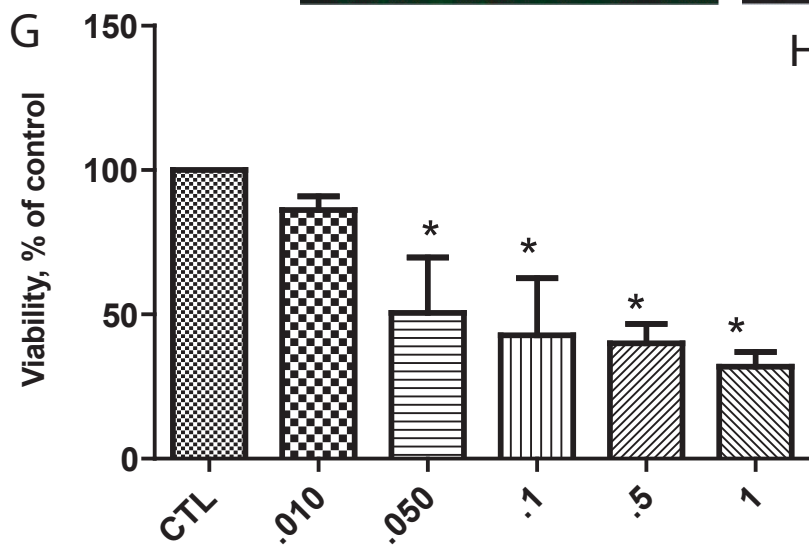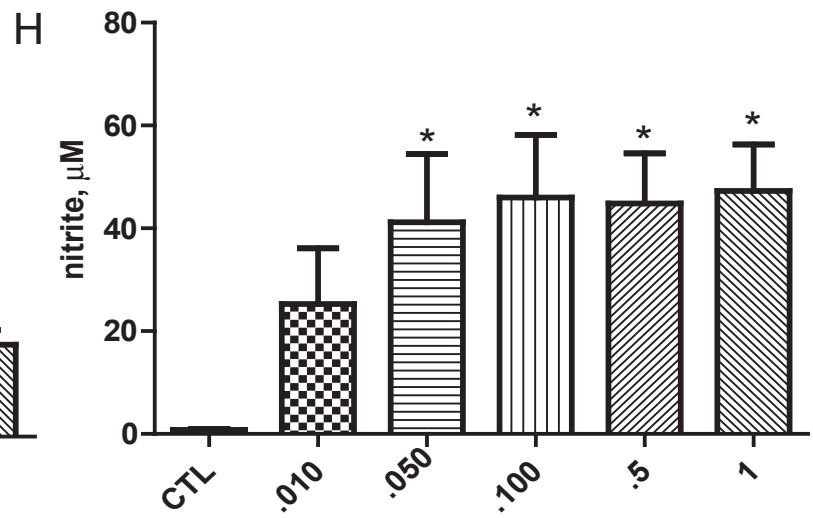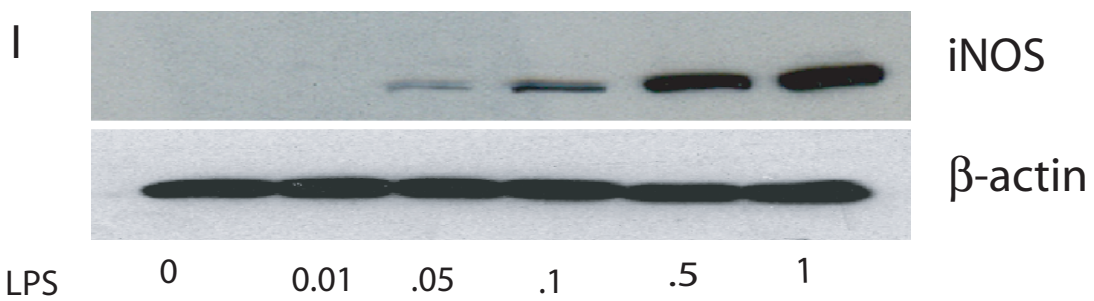

Supplement: MOESM1 [file 9558234]
